# Supplementary material for: Silencing CCR2 in Macrophages Alleviates Adipose Tissue Inflammation and the Associated Metabolic Syndrome in Dietary Obese Mice
Source: PubMed Central journal article supplement — Mol Ther Nucleic Acids. 2016 Jan 26;5(1):e280–. doi: 10.1038/mtna.2015.51 (PMC5012549; doi:10.1038/mtna.2015.51), 2016-01-26

## Supplementary Information

**Supplementary Table 1. Primer sequences used in this study**

| Target gene   | Target Sequence                                     |
|---------------|-----------------------------------------------------|
| CCR2          | 5'-ATCCACGGCATACTATCAACATC-3' ( <i>forward</i> )    |
|               | 5'- CAAGGCTCACCATCATCGTAG – 3' ( <i>reverse</i> )   |
| F4/80         | 5'- TGACTCACCTTGTGGTCCTAA -3' ( <i>forward</i> )    |
|               | 5'- CTTCCCAGAATCCAGTCTTTCC -3' ( <i>reverse</i> )   |
| CD68          | 5'- CTTCCCACAGGCAGCACAG -3' ( <i>forward</i> )      |
|               | 5'- AATGATGAGAGGCAGCAAGAGG -3' ( <i>reverse</i> )   |
| CD11c         | 5'- AAAATCTCCAACCCATGCTG -3' ( <i>forward</i> )     |
|               | 5'- CACCACCAGGGTCTTCAAGT -3' ( <i>reverse</i> )     |
| CD206         | 5'- CAGGTGTGGGCTCAGGTAGT -3' ( <i>forward</i> )     |
|               | 5'- TGT GGT GAG CTG AAA GGT GA -3                   |
| TNF- $\alpha$ | 5'- AAGCCTGTAGCCCACGTCGTA -3' ( <i>forward</i> )    |
|               | 5'- GGCACCACTAGTTGGTTGTCTTTG -3' ( <i>reverse</i> ) |
| iNOS          | 5'- CAGAGGACCCAGAGACAAGC -3' ( <i>forward</i> )     |
|               | 5'- TGCTGAAACATTTCTGTGC -3' ( <i>reverse</i> )      |
| SCD-1         | 5'- GCTGGAGTACGTCTGGAGGAA -3' ( <i>forward</i> )    |
|               | 5'- TCCCGAAGAGGCAGGTGTAG -3' ( <i>reverse</i> )     |
| 36B4          | 5'- C TTCATTGTGGGAGCAGACA -3' ( <i>forward</i> )    |
|               | 5'- TCTCCAGAGCTGGGTTGTTC -3' ( <i>reverse</i> )     |
| GAPDH         | 5'- AGGTCGGTGTGAACGGATTTG -3' ( <i>forward</i> )    |
|               | 5'- TGTAGACCATGTAGTTGAGGTCA -3' ( <i>reverse</i> )  |

### **Supplementary Figure Legends.**

**Fig S1. Evaluation of toxicity.** Cytotoxicity was measured by the CCK-8 viability assay 24h post transfection of Raw 264.7 cells with indicated reagents. LMN represents Lipofectamine 2000.

**Fig S2. Daily food intake in the mouse cohorts.** Error bars indicate the SEM.

Figure S1

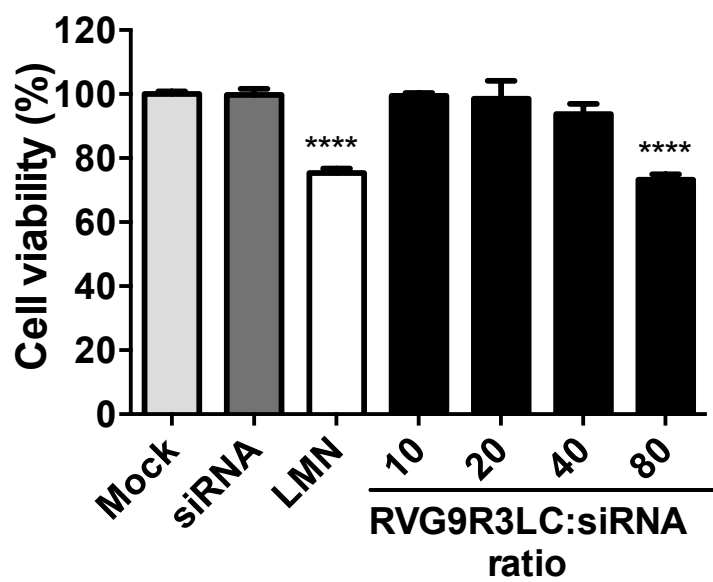

**Figure S2**

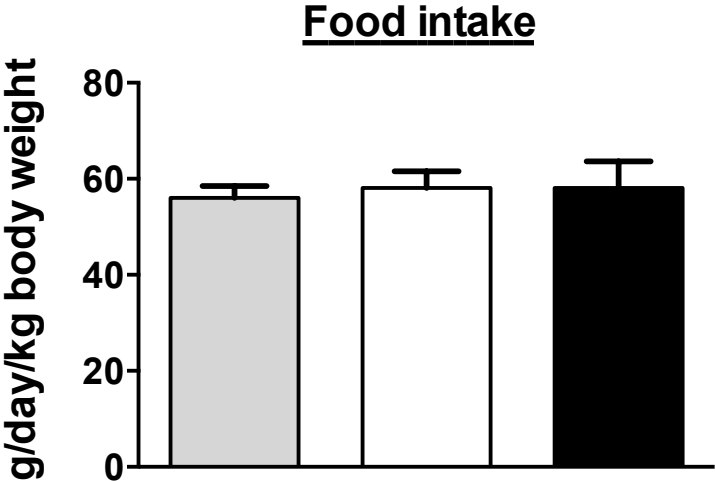

Supplement: mtna201551x1.pdf [file mtna201551x1.pdf]
